# Supplementary material for: Data-driven hypothesis generation among inexperienced clinical researchers: A comparison of secondary data analyses with visualization (VIADS) and other tools
Source: bioRxiv or medRxiv preprint supplement (doi:10.1101/2023.05.30.23290719), 2023-10-31
Supplement: Supplementary file [file media-2.pdf]

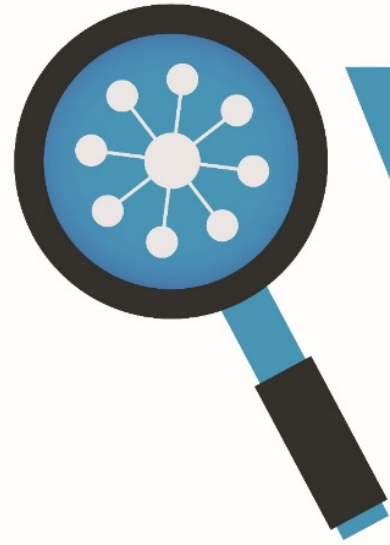

# VIADS

a **Visual Interactive Analysis** tool for filtering and summarizing large **Data Sets** coded with hierarchical terminologies

## VIADS study session-training

---

2021-12-02 @Clemson

# Background

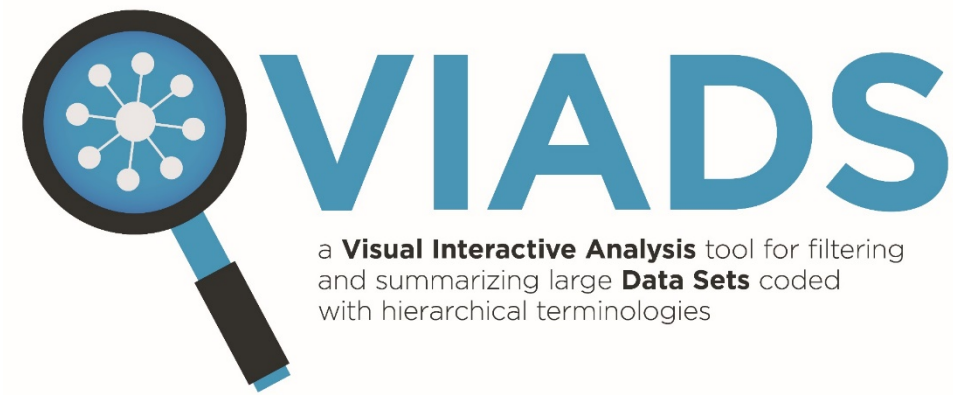

- Visualization
  - Versus excel files
  - Hierarchical relationships
- Data sets coded by hierarchical ***terminologies*** in health care
  - ICD9 (monohierarchic)
  - ICD10 (monohierarchic)
  - MeSH (polyhierarchic)
- However

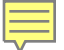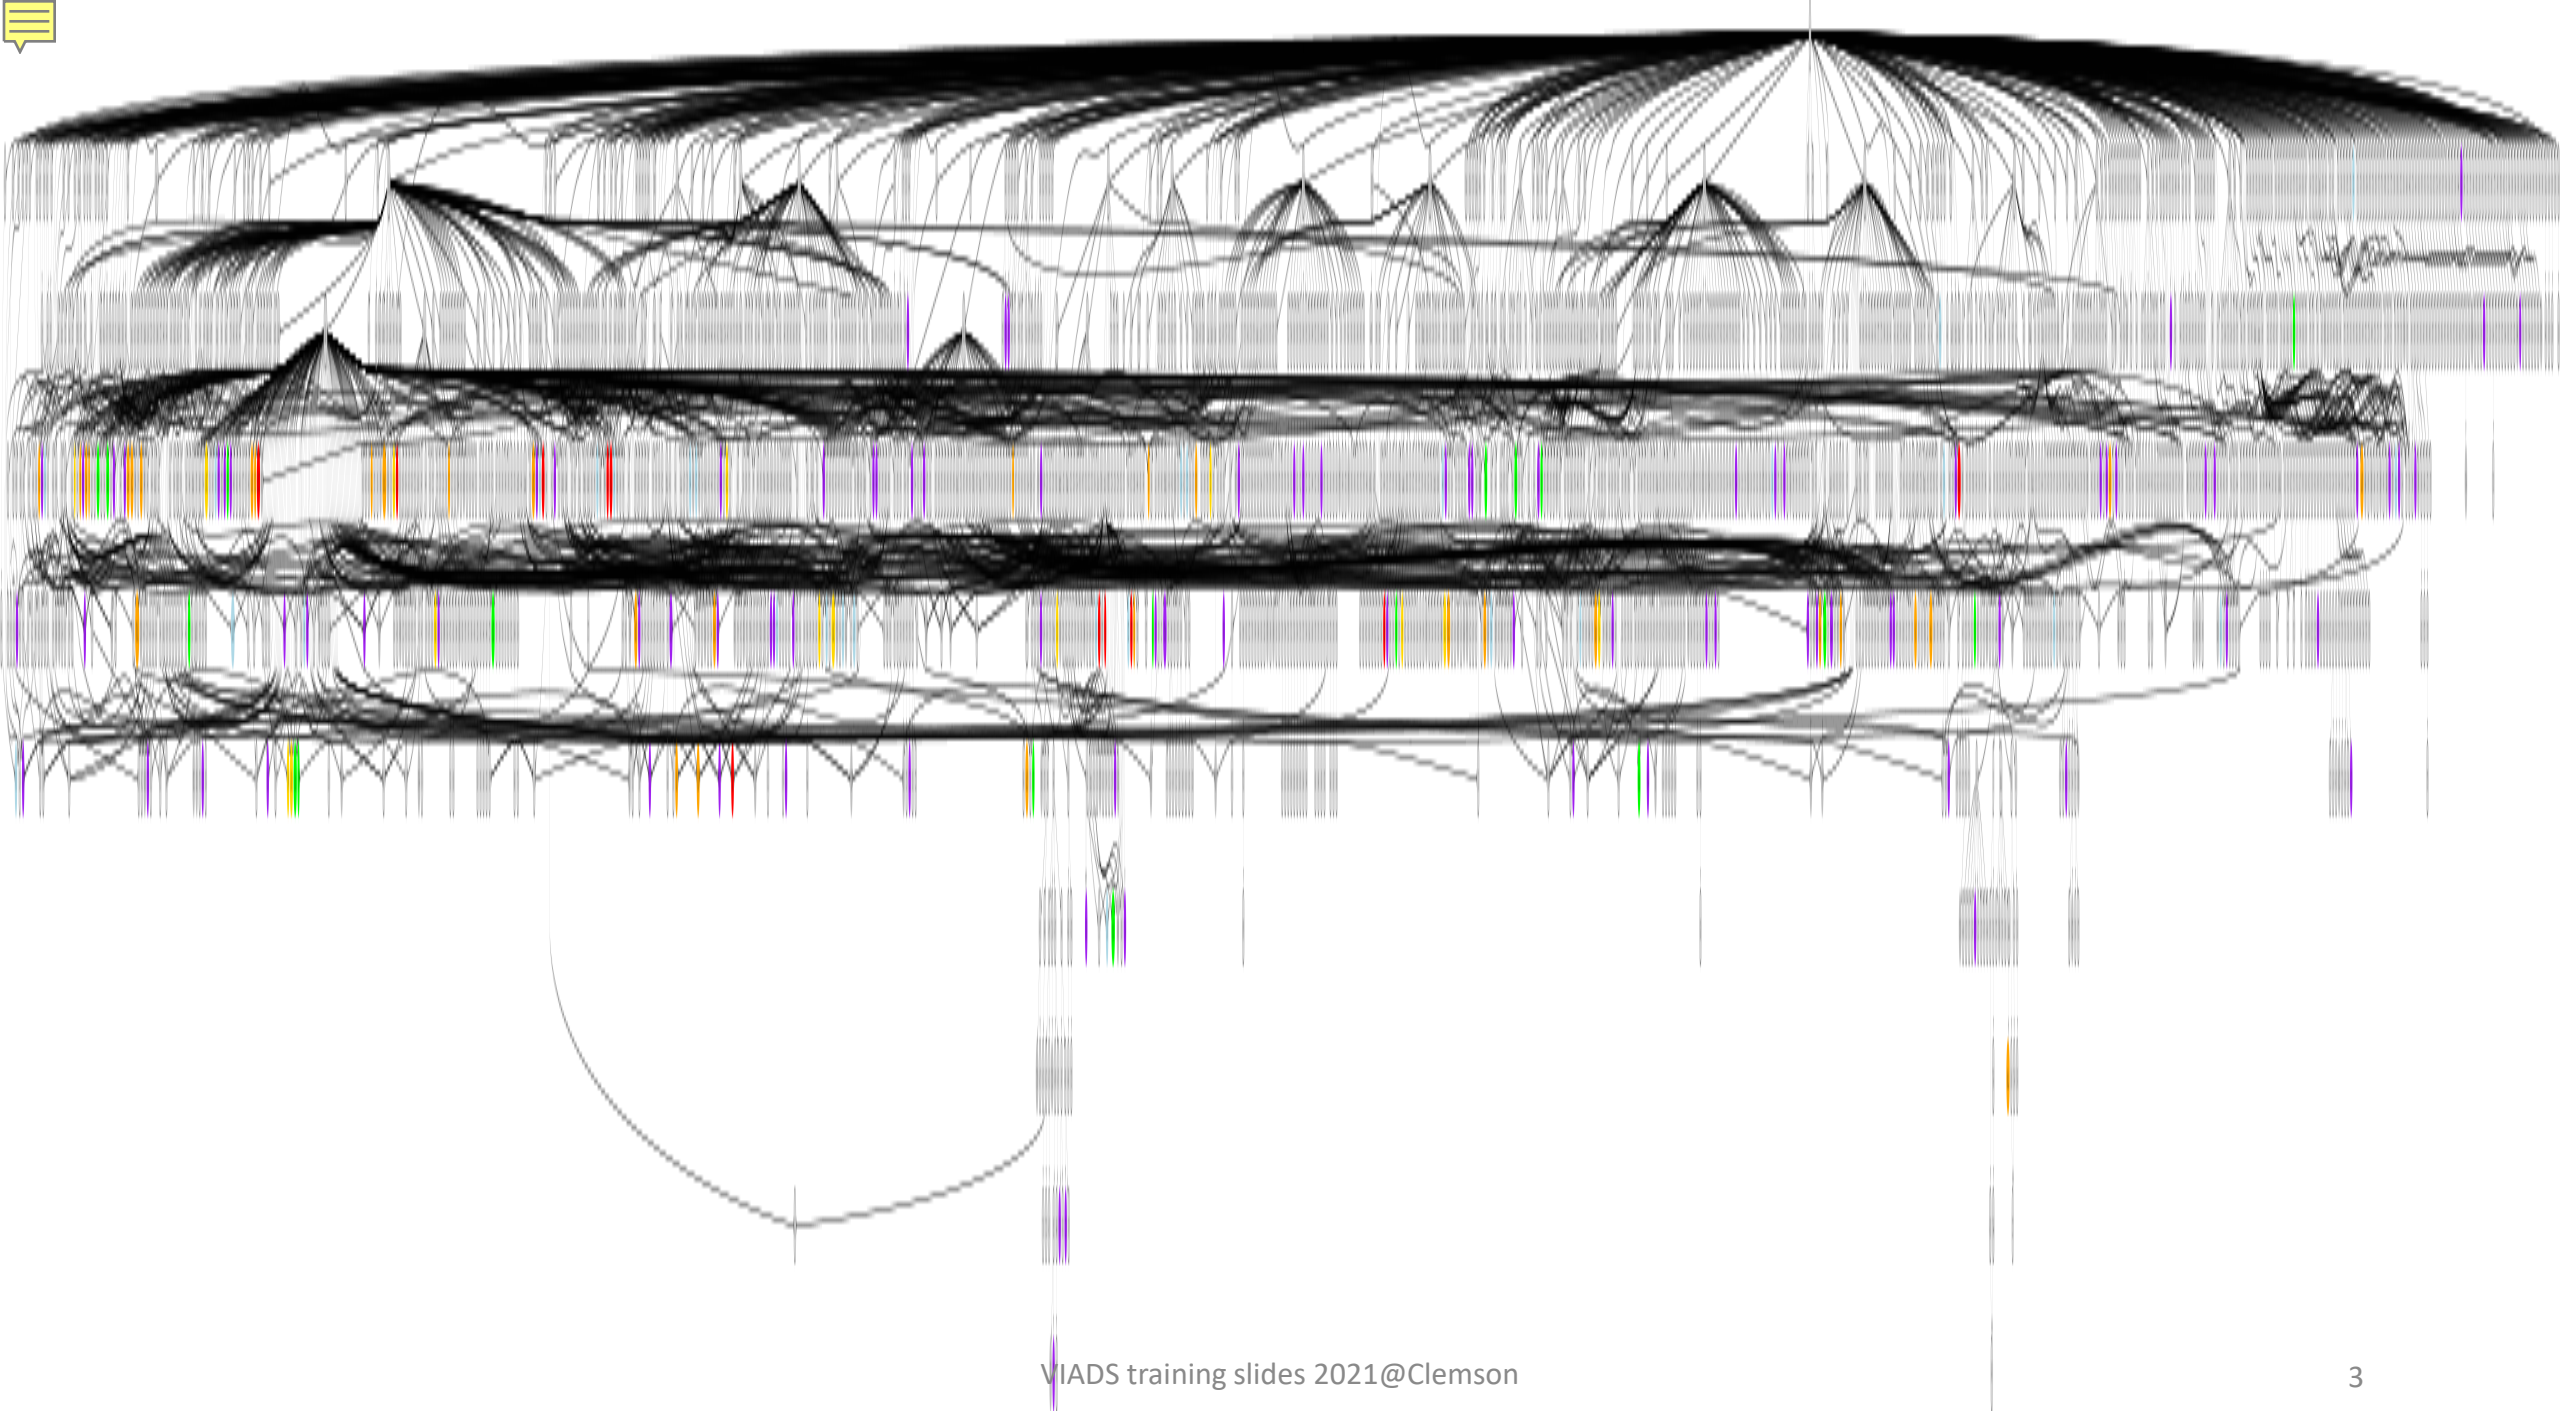

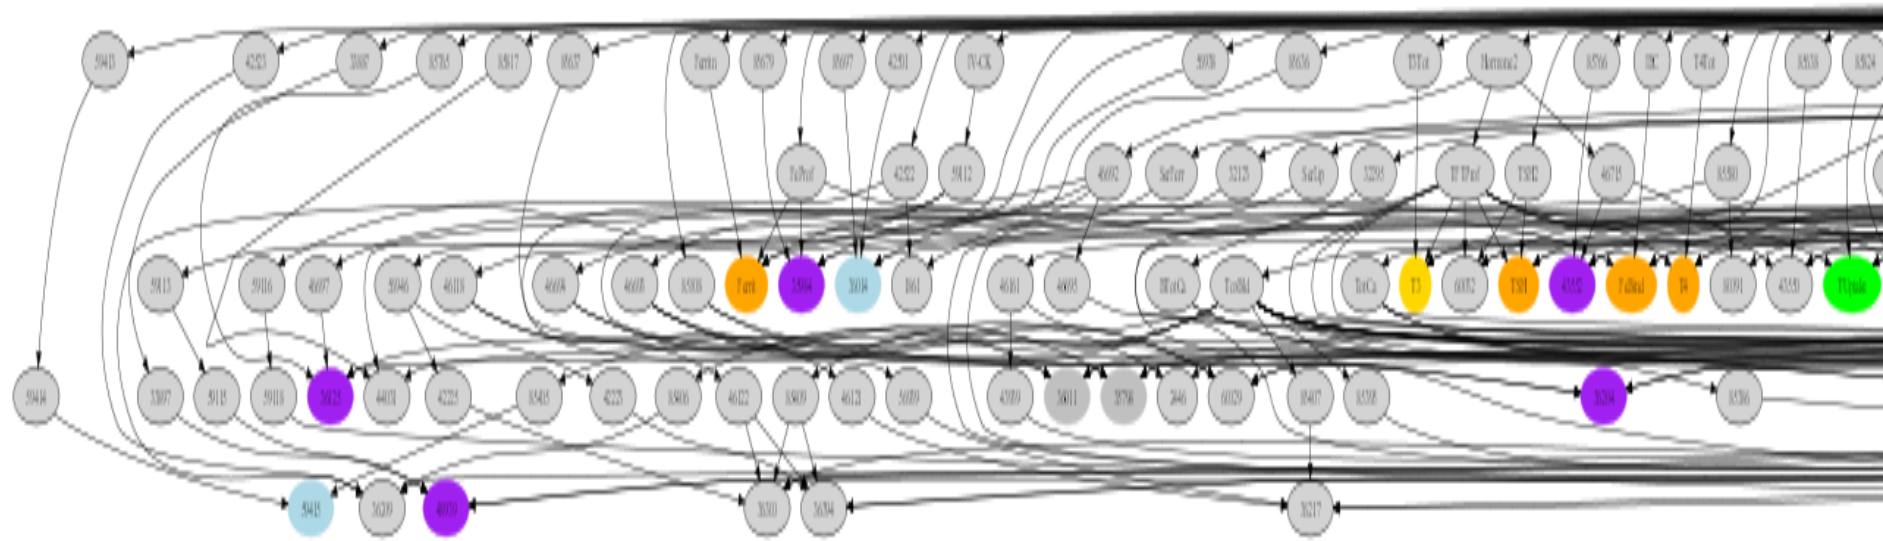

# Background (Cont.)

- Algorithms development

- **Reduce** size

- **Simplify** complexity

- **Analyze** large data set

- Summarize

- Compare & highlight

- By using hierarchical **terminologies & frequencies**



# Filter --- node counts (NC)

If  $NC \geq T_{nc}$ , then display node n.

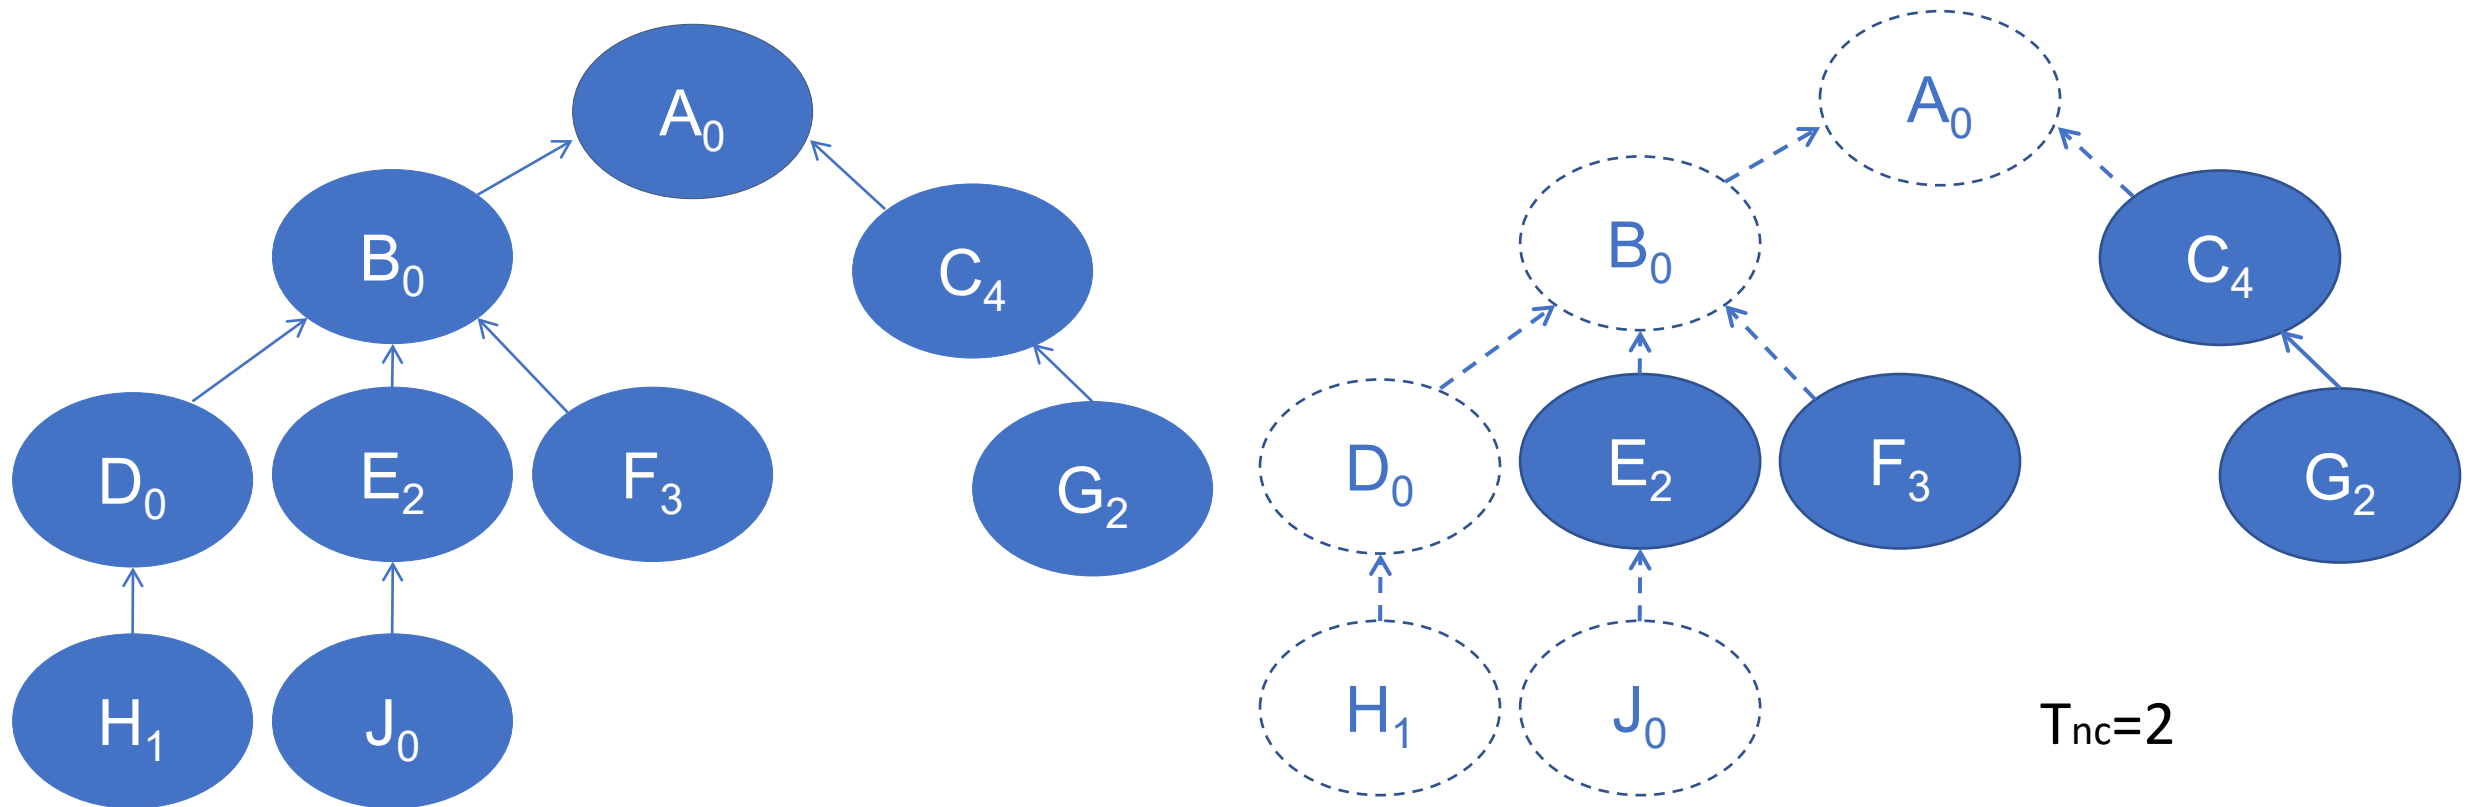

# Filter --- class counts (CC)

- $CC_n = NC_{dn1} + NC_{dn2} + NC_{dn3} \dots NC_{dnk}$

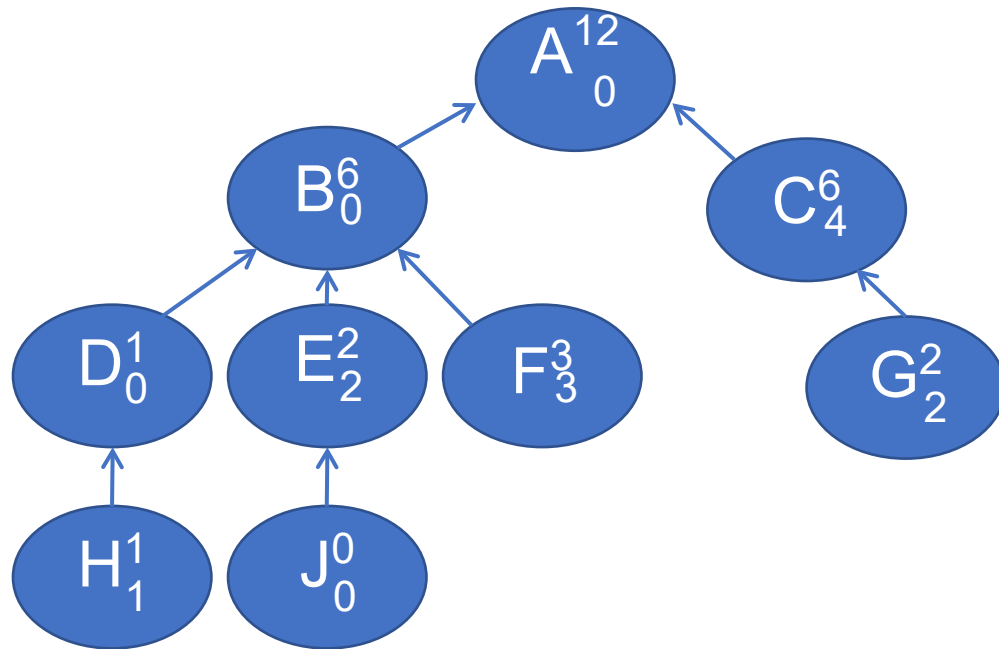

**Table 1** Data table

| Node | Node count | Class count |
|------|------------|-------------|
| A    | 0          | 12          |
| B    | 0          | 6           |
| C    | 4          | 6           |
| D    | 0          | 1           |
| E    | 2          | 2           |
| F    | 3          | 3           |
| G    | 2          | 2           |
| H    | 1          | 1           |
| J    | 0          | 0           |

# Filtering --- class counts

If  $CC_n \geq T_{cc}$ , then display  $n$  and *all the ancestors* of  $n$  in the terminological structure.

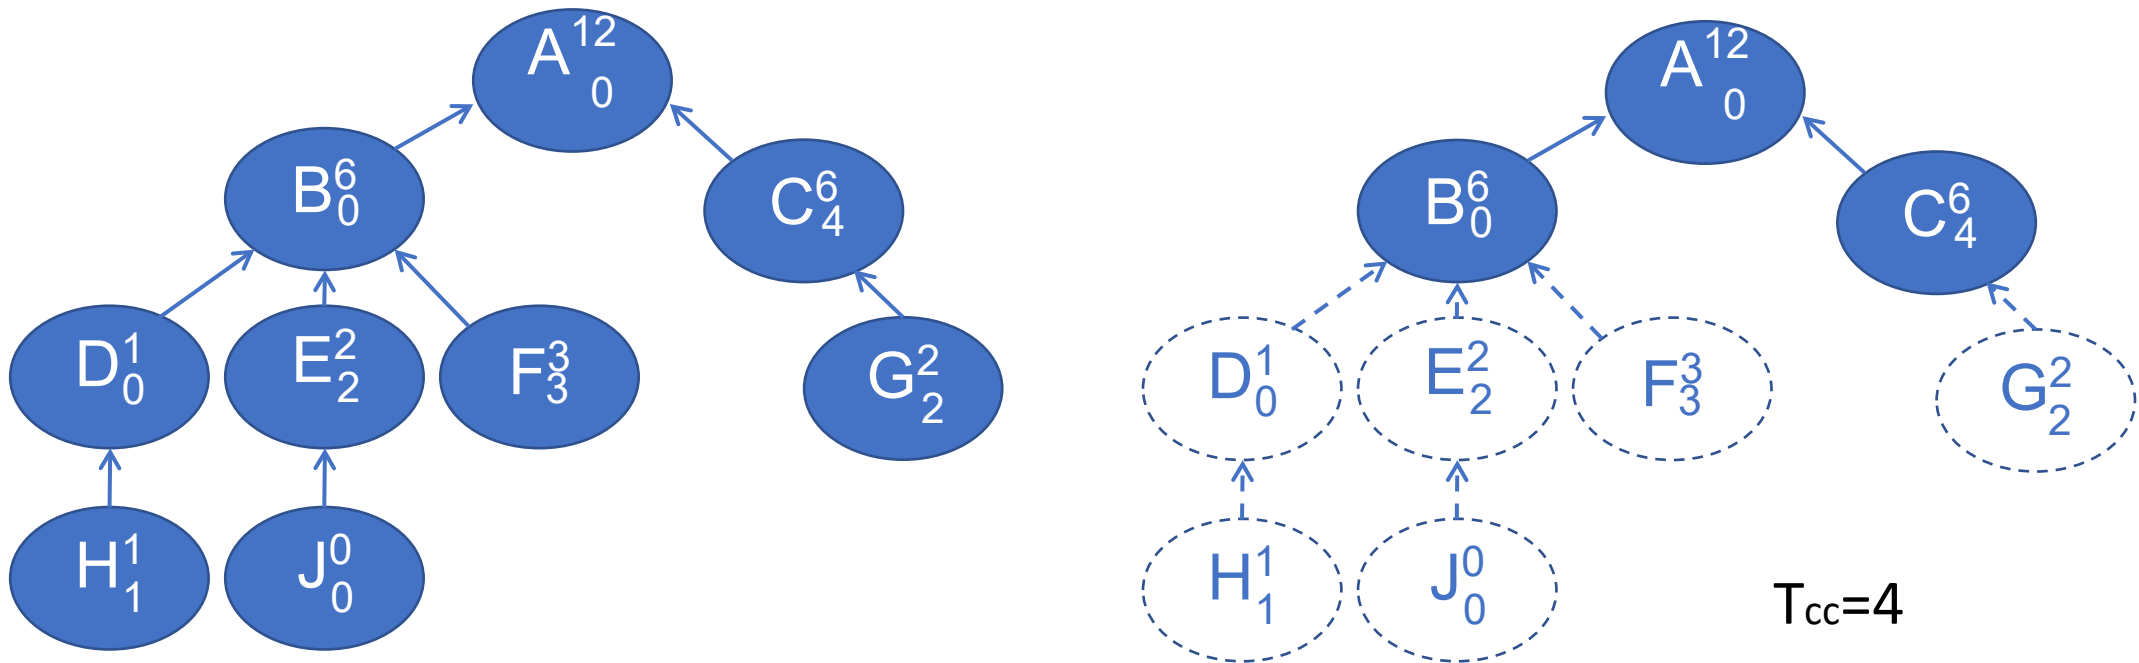



# Filter --- ratio values (RV)

- $RV_n = CC_n / CC_p$

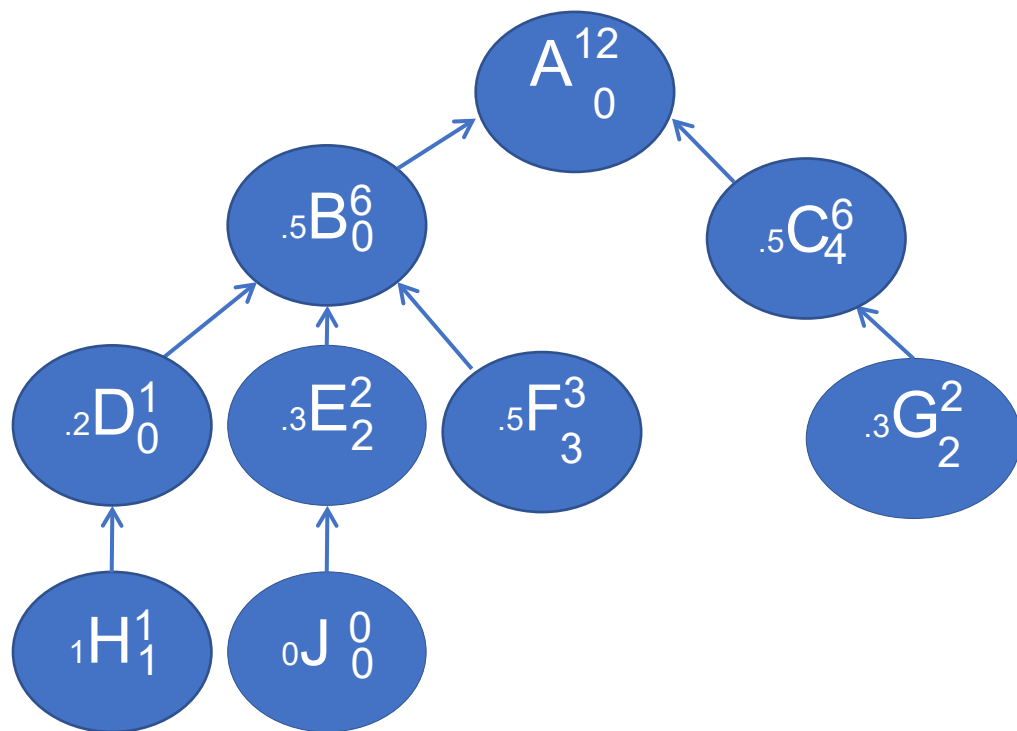

**Table 1** Calculated ratio table

| Node | CC | ratio |
|------|----|-------|
| B    | 6  | 0.5   |
| C    | 6  | 0.5   |
| D    | 6  | 0.2   |
| E    | 2  | 0.3   |
| F    | 3  | 0.5   |
| G    | 2  | 0.3   |
| H    | 1  | 1     |
| J    | 0  | 0     |

# Filter --- ratio values

If  $RV_n \geq T_r$ , then display  $n$  and all the ancestors of  $n$  in the terminological structure.

$$RV_n = CC_n / CC_p$$

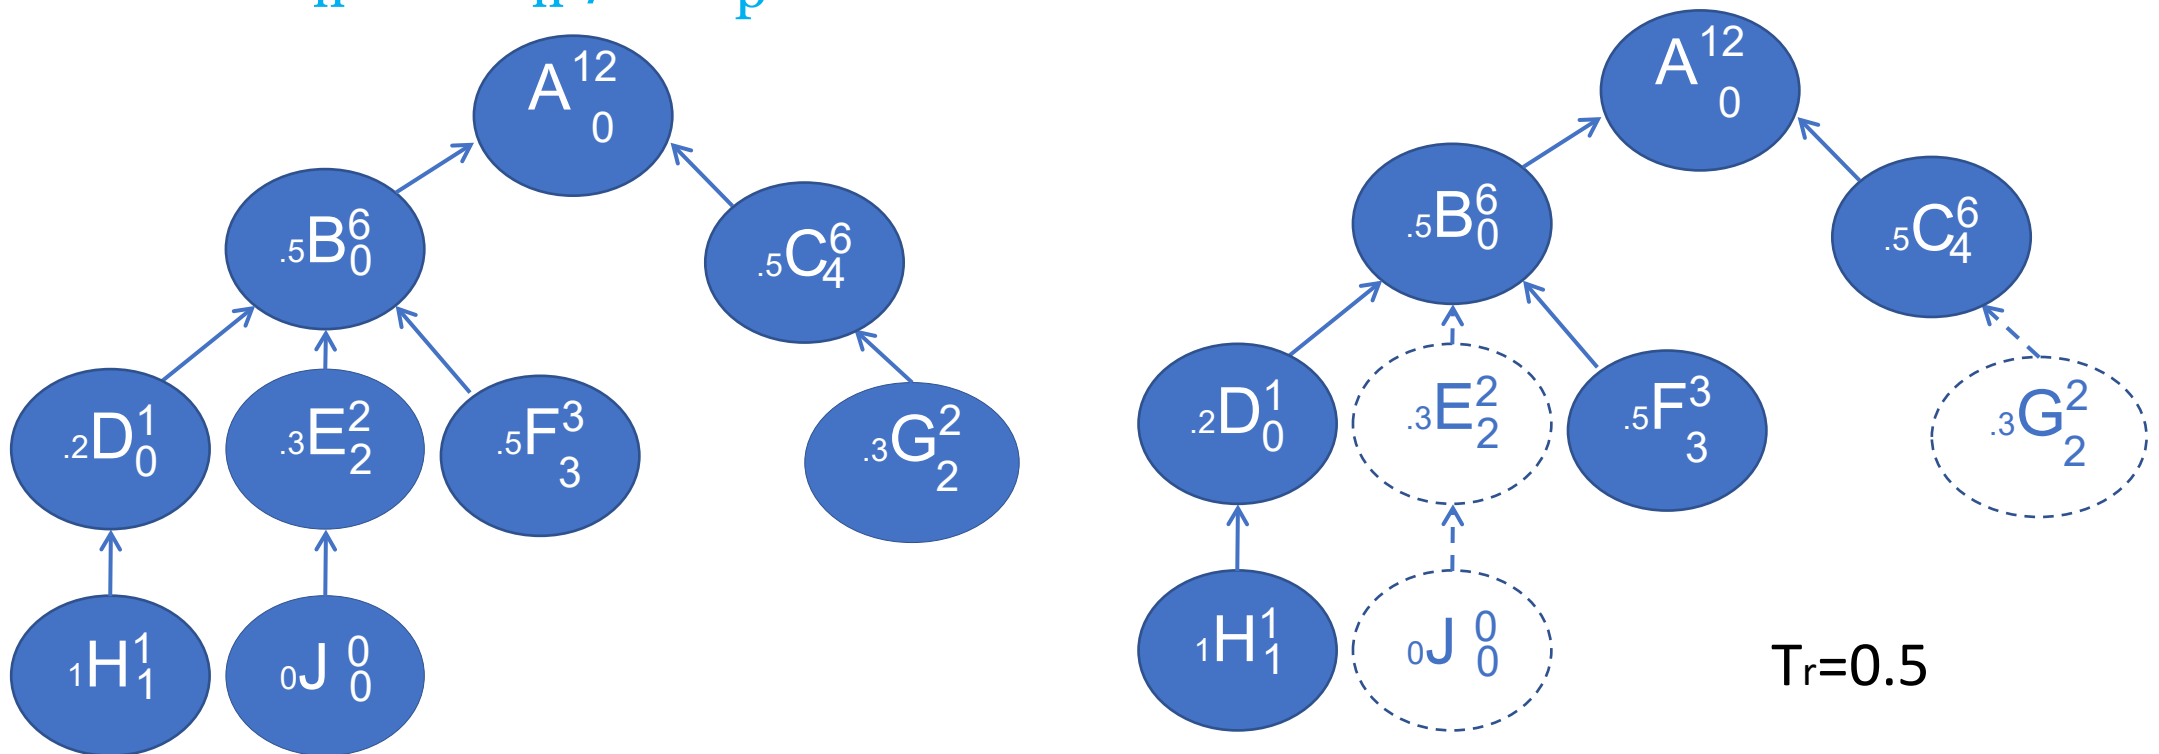

# Comparison of similar data sets(diff)

## ➤ Comparison of two similar data sets

- Two decades, two similar medications (Actos, Avandia), before and after a procedure ...

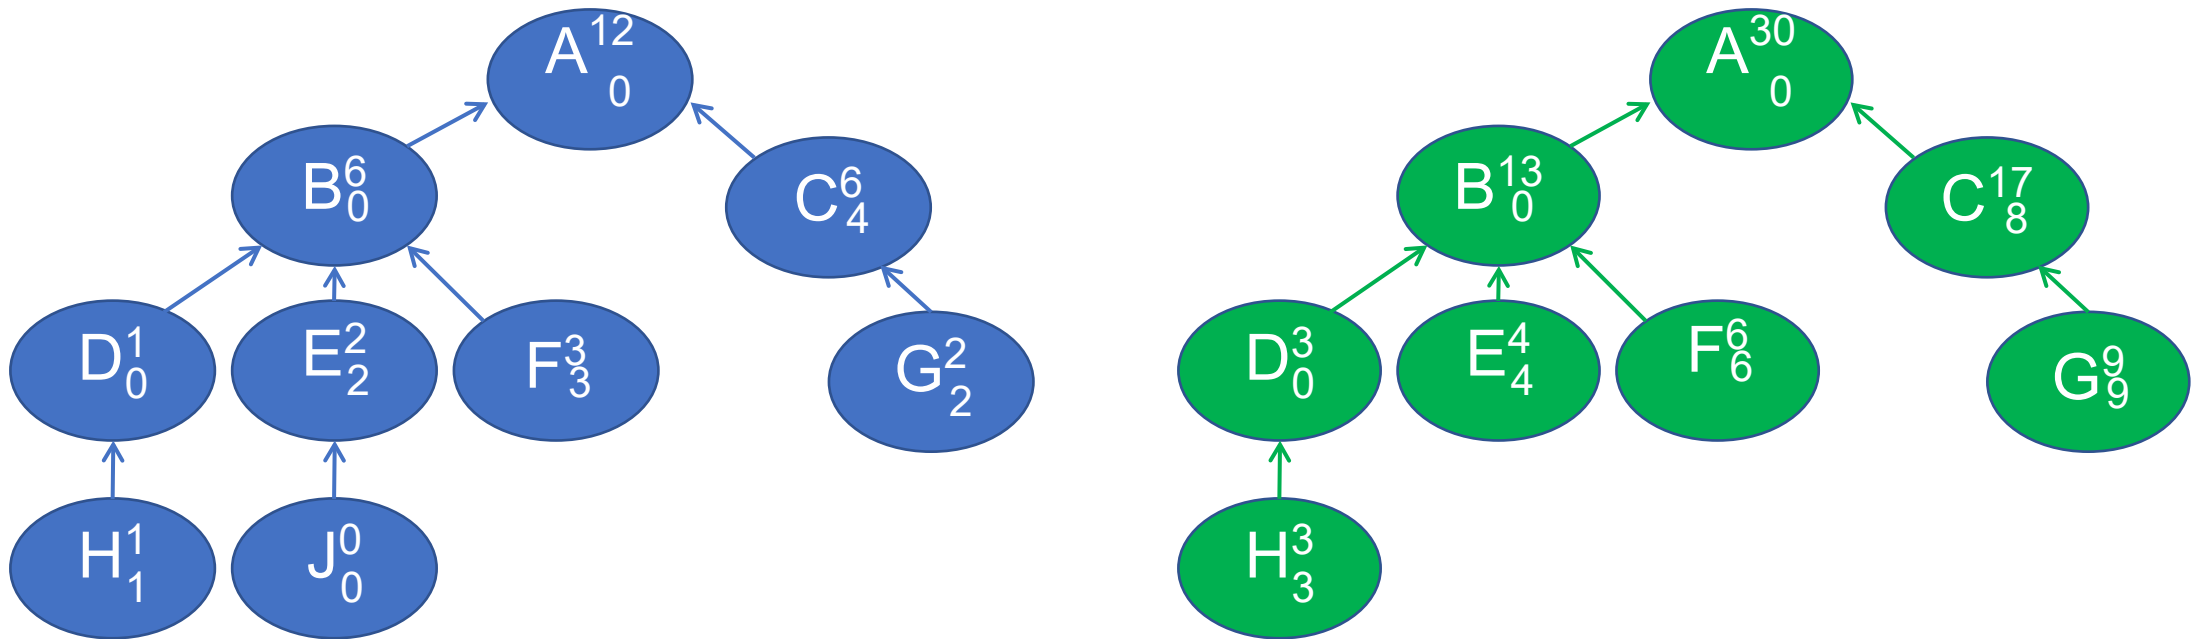

# Filter --- p values for diff data sets (prop.test)

If  $P_n \geq T_p$ , then display n and all the ancestors of n in the terminological structure.

$$CCP(term) = CC(term) / \sum_{k=1}^n CC(term)_k$$

| Node | CC in data set 1 | CC in data set 2 | P value |
|------|------------------|------------------|---------|
| A    | 12               | 30               | 1       |
| B    | 6 (6/12)         | 13 (13/30)       | 0.0065  |
| C    | 6 (6/12)         | 17 (17/30)       | 0.0219  |
| D    | 1 (1/12)         | 3 (3/30)         | 1       |
| E    | 2 (2/12)         | 4 (4/30)         | 0.8521  |
| F    | 3 (3/12)         | 6 (6/30)         | 0.6062  |
| G    | 2 (2/12)         | 9 (9/30)         | 1       |
| H    | 1 (2/12)         | 3 (3/30)         | 1       |

# CC+RV --- thresholds setting

- 3D plot (scatter3dplot, R)- highlight points
  - CC, RV, the number of nodes in filtered graphs
- Regression plane
  - Minimizes the total of the squared distances: the observed values → the closest point on the regression plane
  - The least squared distance (residual, R)
- Select data points
  - **90-120 + closest to the plane**

# scatterplot3d - u2011ab\_mrsat\_med2011\_tt\_e/ratio/cc/sn\_rp

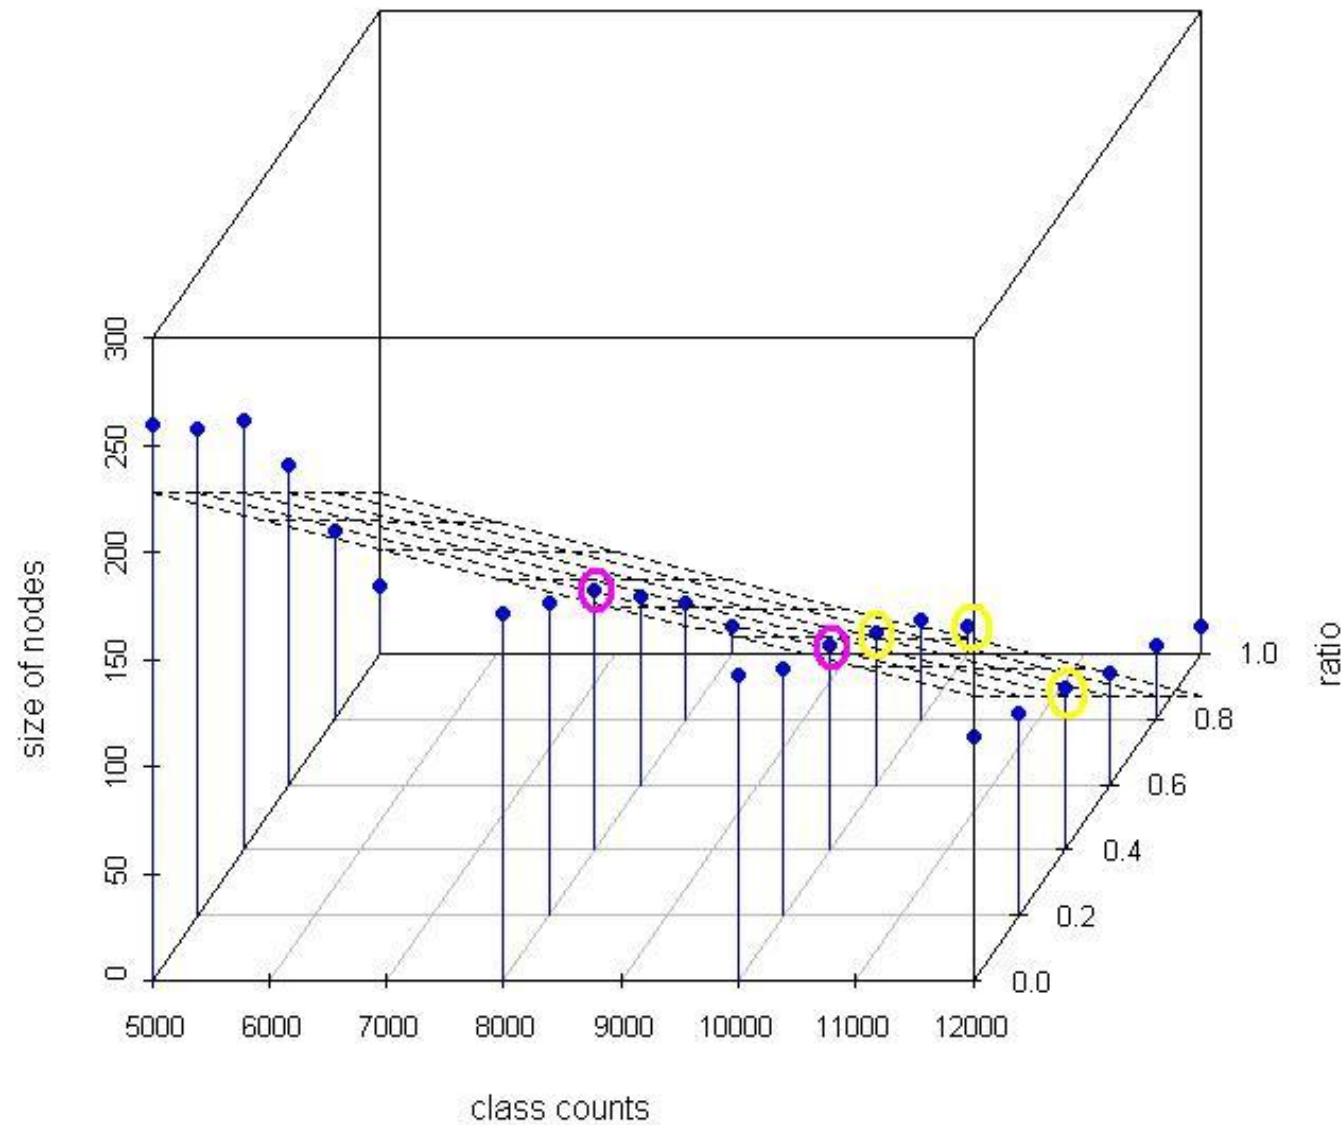

3D plot of class count thresholds, ratio value thresholds and the number of nodes in filtered graphs for MeSH terms in 2011 with the regression plane.

# Purposes of using VIADS

- Facilitate to understand the data sets
- See the bigger picture, aggregated effects
- Highlight the differences
- By trimming down the relatively unimportant parts
  
- To generate *new research ideas*

## **Diseases and Injuries Tabular Index**

**1. INFECTIOUS AND PARASITIC DISEASES (001-139)**

**2. NEOPLASMS (140-239)**

**3. ENDOCRINE, NUTRITIONAL AND METABOLIC DISEASES, AND IMMUNITY DISORDERS (240-279)**

**4. DISEASES OF THE BLOOD AND BLOOD-FORMING ORGANS (280-289)**

**5. MENTAL DISORDERS (290-319)**

**6. DISEASES OF THE NERVOUS SYSTEM AND SENSE ORGANS (320-389)**

**7. DISEASES OF THE CIRCULATORY SYSTEM (390-459)**

**8. DISEASES OF THE RESPIRATORY SYSTEM (460-519)**

**9. DISEASES OF THE DIGESTIVE SYSTEM (520-579)**

**10. DISEASES OF THE GENITOURINARY SYSTEM (580-629)**

**11. COMPLICATIONS OF PREGNANCY, CHILDBIRTH, AND THE PUERPERIUM (630-679)**

**12. DISEASES OF THE SKIN AND SUBCUTANEOUS TISSUE (680-709)**

**13. DISEASES OF THE MUSCULOSKELETAL SYSTEM AND CONNECTIVE TISSUE (710-739)**

**14. CONGENITAL ANOMALIES (740-759)**

**15. CERTAIN CONDITIONS ORIGINATING IN THE PERINATAL PERIOD (760-779)**

**16. SYMPTOMS, SIGNS, AND ILL-DEFINED CONDITIONS (780-799)**

**17. INJURY AND POISONING (800-999)**

**SUPPLEMENTARY CLASSIFICATION OF FACTORS INFLUENCING HEALTH STATUS AND CONTACT WITH HEALTH SERVICES (V01-V89)**

**SUPPLEMENTARY CLASSIFICATION OF EXTERNAL CAUSES OF INJURY AND POISONING (E800-E999)**



# 1. INFECTIOUS AND PARASITIC DISEASES (001-139)

## TUBERCULOSIS (010-018)

### Includes:

infection by *Mycobacterium tuberculosis* (human) (bovine)

### Excludes:

*congenital tuberculosis* (771.2)

*late effects of tuberculosis* (137.0-137.4)

The following fifth-digit subclassification is for use with categories 010-018:

0 unspecified

1 bacteriological or histological examination not done

2 bacteriological or histological examination unknown (at present)

3 tubercle bacilli found (in sputum) by microscopy

4 tubercle bacilli not found (in sputum) by microscopy, but found by bacterial culture

5 tubercle bacilli not found by bacteriological examination, but tuberculosis confirmed histologically

6 tubercle bacilli not found by bacteriological or histological examination, but tuberculosis confirmed by other methods [inoculation of animals]

### 010 Primary tuberculous infection

Requires fifth digit. See beginning of section 010-018 for codes and definitions.

### 011 Pulmonary tuberculosis

Requires fifth digit. See beginning of section 010-018 or codes and definitions.

Use additional code to identify any associated silicosis (502)

### 012 Other respiratory tuberculosis

Requires fifth digit. See beginning of section 010-018 for codes and definitions.

### Excludes:

*respiratory tuberculosis, unspecified* (011.9)

### 013 Tuberculosis of meninges and central nervous system

Requires fifth digit. See beginning of section 010-018 for codes and definitions.

## TUBERCULOSIS (010-018)

### 010 Primary tuberculous infection

Requires fifth digit. See beginning of section 010-018 for codes and definitions.

#### 010.0 Primary tuberculous infection

[0-6]

#### Excludes:

*nonspecific reaction to tuberculin skin test without active tuberculosis* (795.5)

*positive PPD* (795.5)

*positive tuberculin skin test without active tuberculosis* (795.5)

#### 010.1 Tuberculous pleurisy in primary progressive tuberculosis

[0-6]

#### 010.8 Other primary progressive tuberculosis

[0-6]

#### Excludes:

*tuberculous erythema nodosum* (017.1)

#### 010.9 Primary tuberculous infection, unspecified

[0-6]
